# Supplementary material for: Compressive strain induced superior HER performance of nickel in alkaline solution
Source: Royal Society of Chemistry journal article supplement (doi:10.1039/d2cp04600h), 2022-01-01
Supplement: d2cp04600h1.pdf [file d2cp04600h1.pdf]

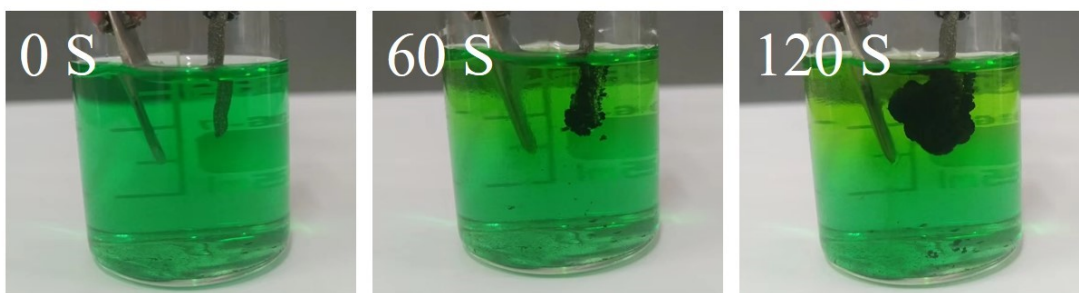

1

2 **Fig S1:** Photographs of the electrodeposition process.

3

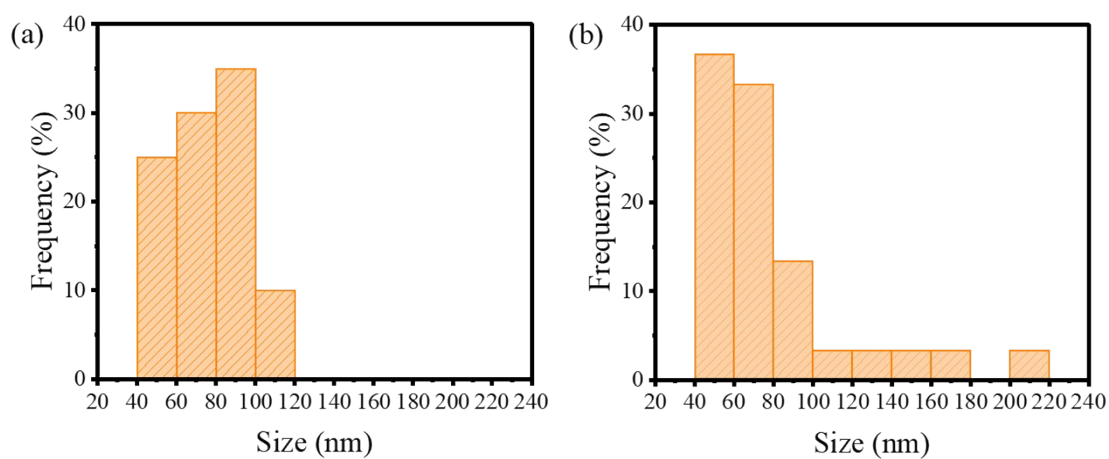

4

5 **Fig S2:** Size distribution histograms of (a) EG-Ni; (b) S-Ni.

6

7

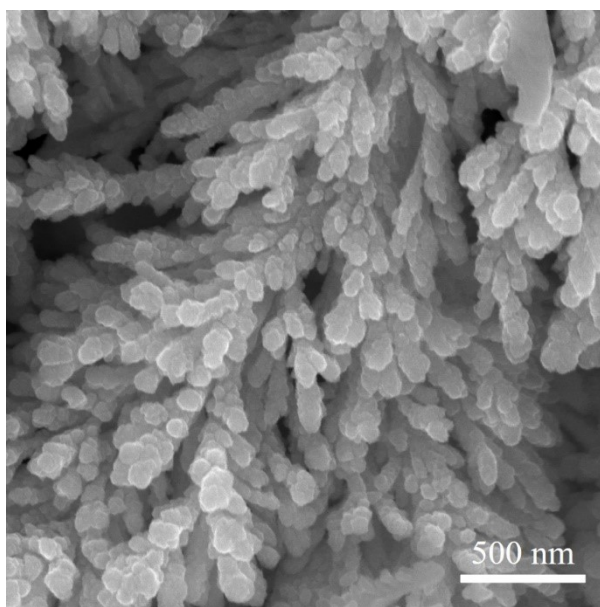

8

9 **Fig S3:** FESEM of A-EG-Ni.

10

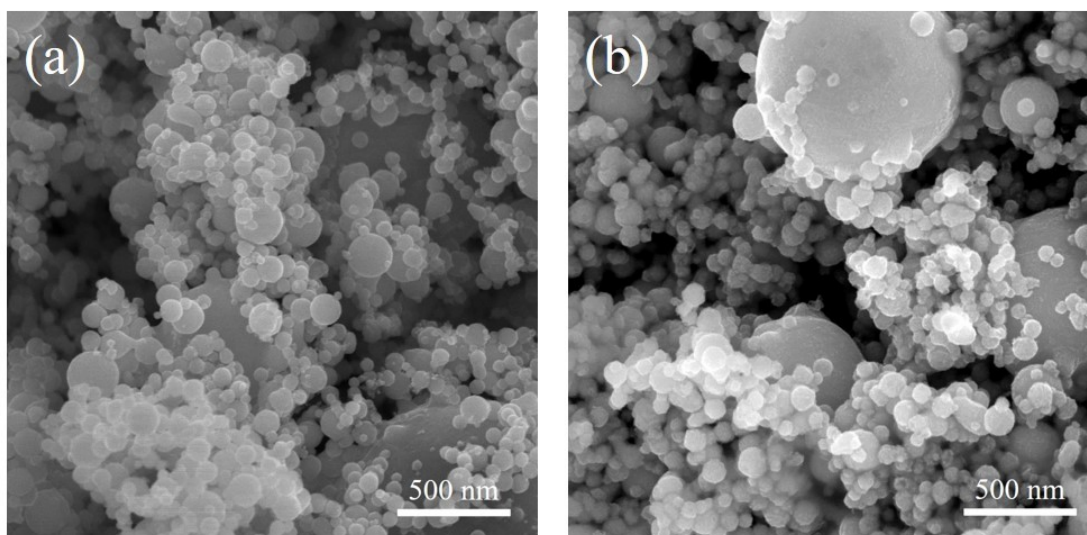

11  
12 **Fig S4:** FESEM of (a) S-Ni and (b) A-S-Ni.

13  
14

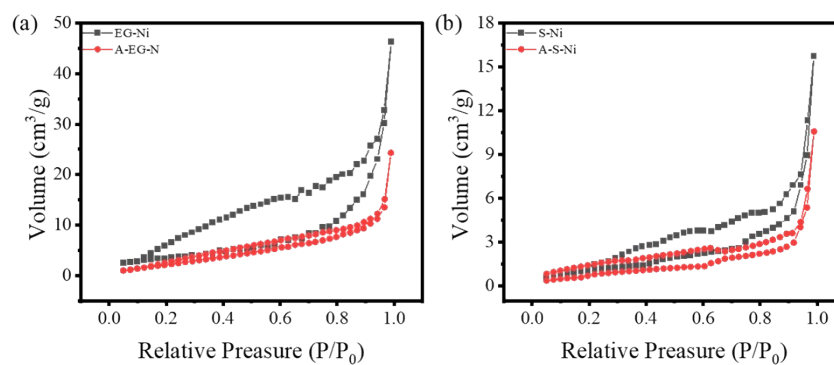

15  
16 **Figure S5:** The N<sub>2</sub> adsorption/desorption isotherm curves of (a) EG-Ni and A-EG-Ni,  
17 (b) S-Ni and A-S-Ni.

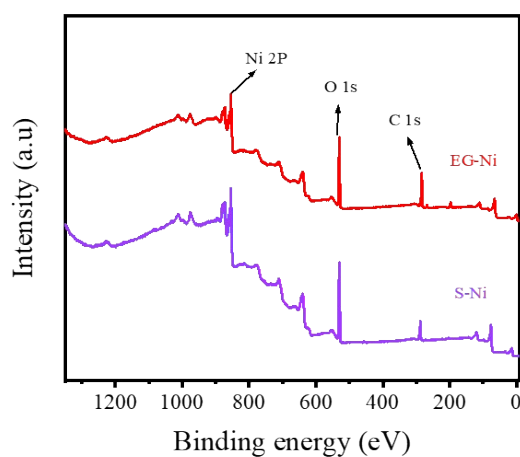

18  
19 **Fig S6:** Full scan XPS spectra of EG-Ni and S-Ni.

20  
21  
22

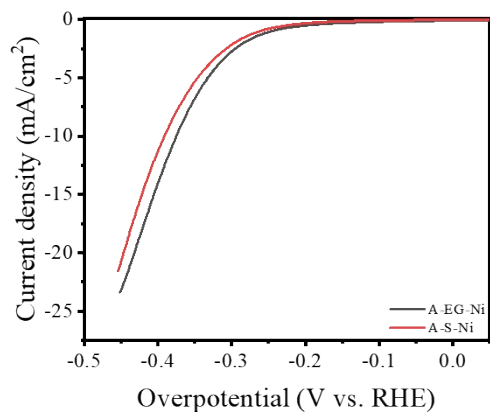

23

24

25 **Fig S7:** Linear polarization curves of A-EG-Ni and A-S-Ni.

26

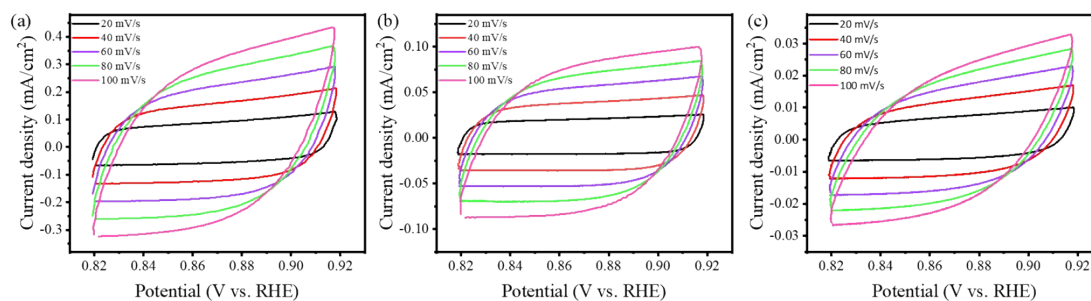

27

28 **Fig S8:** CV curves of (a) EG-Ni (loading x4), (b) EG-Ni and (c) S-Ni.

29

30

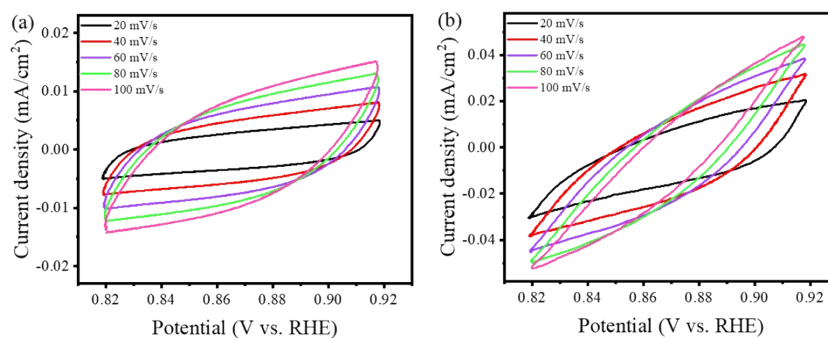

31

32

33 **Fig S9:** CV curves of (a) A-EG-Ni and (b) A-S-Ni.

34

35

36

37

38

39

40

41

42 **Table S1:** The corresponding parameters of the elements in the insert equivalent circuit  
 43 of the 40% Pt/C, EG-Ni (loading x4), EG-Ni and S-Ni electrode.

| Electrode          | $R_s$ ( $\Omega$ ) | $R_p$ ( $\Omega$ ) | $R_{ct}$ ( $\Omega$ ) |
|--------------------|--------------------|--------------------|-----------------------|
| 40% Pt/C           | 4.703              | 0.553              | 2.490                 |
| EG-Ni (loading x4) | 4.366              | 1.686              | 1.465                 |
| EG-Ni              | 4.659              | 2.694              | 11.540                |
| S-Ni               | 4.965              | 5.092              | 16.240                |

44  
 45 **Table S2:** Comparison of HER performance of EG-Ni with some Ni-based catalyst.

| catalyst                                                  | Overpotential $j_{10}$ (mV) | Tafel Slope (mV/dec) | Loading (mg/cm <sup>2</sup> ) | Electrolyte                          | Scan rate (mV/s) | Ref.      |
|-----------------------------------------------------------|-----------------------------|----------------------|-------------------------------|--------------------------------------|------------------|-----------|
| EG-Ni                                                     | 85.9                        | 91.4                 | 4                             | 1 M KOH                              | 5                | This work |
| NiCu@C-1                                                  | 94                          | 74                   | 0.38                          | 1 M KOH                              | 10               | 1         |
| Ni-rGO <sub>1.0</sub>                                     | 36                          | 77                   | /                             | 1 M KOH                              | 5                | 2         |
| Ni-Ni(OH) <sub>2</sub>                                    | 72                          | 43                   | /                             | 1 M KOH                              | 5                | 3         |
| MoS <sub>2</sub> /(CoNi @Gr)                              | 150                         | 66                   | 0.5                           | 0.5 M H <sub>2</sub> SO <sub>4</sub> | 5                | 4         |
| np-Ni <sub>3</sub> N                                      | 50                          | /                    | 0.32                          | 0.1 M KOH                            | 10               | 5         |
| Ni-N <sub>0.19</sub>                                      | 42                          | 125                  | /                             | 1 M KOH                              | 3                | 6         |
| Ni <sub>SA</sub> Fe <sub>SA</sub> Ni <sub>50</sub> Fe/CNT | 64                          | 48.1                 | 2                             | 1 M KOH                              | 5                | 7         |
| Ni <sub>3</sub> Fe <sub>0.9</sub> Cr <sub>0.1</sub> /CACC | 128                         | 120                  | /                             | 1 M KOH                              | 10               | 8         |

46  
 47

48 **References**

49

50

51 [1] Shen, Y.; Zhou, Y.; Wang, D.; Wu, X.; Li, J.; Xi, J. *Adv. Energy. Mater.* **2018**, 8, (2), 1701759.

52 [2] Wang, L.; Li, Y.; Xia, M.; Li, Z.; Chen, Z.; Ma, Z.; Qin, X.; Shao, G. *J. Power Sources* **2017**, 347,  
53 220-228.

54 [3] Zhong, W.; Li, W.; Yang, C.; Wu, J.; Zhao, R.; Idrees, M.; Xiang, H.; Zhang, Q.; Li, X. *J. Energy.*  
55 *Chem.* **2021**, 61, 236-242.

56 [4] Tu, Y.; Deng, J.; Ma, C.; Yu, L.; Bao, X.; Deng, D. *Nano Energy* **2020**, 72, 104700.

57 [5] Wang, T.; Wang, M.; Yang, H.; Xu, M.; Zuo, C.; Feng, K.; Xie, M.; Deng, J.; Zhong, J.; Zhou, W.;  
58 Cheng, T.; Li, Y. *Energy Environ. Sci.* **2019**, 12, (12), 3522-3529.

59 [6] Li, Y.; Tan, X.; Chen, S.; Bo, X.; Ren, H.; Smith, S. C.; Zhao, C. *Angew. Chem. Int. Ed.* **2019**, 58,  
60 (2), 461-466.

61 [7] Luo, W.; Wang, Y.; Luo, L.; Gong, S.; Wei, M.; Li, Y.; Gan, X.; Zhao, Y.; Zhu, Z.; Li, Z. *ACS Catal.*  
62 **2022**, 12, (2), 1167-1179.

63 [8] Zheng, J.; Zhang, J.; Zhang, L.; Zhang, W.; Wang, X.; Cui, Z.; Song, H.; Liang, Z.; Du, L. *ACS Appl.*  
64 *Mater. Interfaces* **2022**, 14, (17), 19524-19533.

65
